# Supplementary material for: Endohedral metallofullerenes, M@C60 (M = Ca, Na, Sr): selective adsorption and sensing of open-shell NOx gases
Source: Royal Society of Chemistry journal article supplement (doi:10.1039/c6cp02249a), 2016-01-01
Supplement: c6cp02249a1.pdf [file c6cp02249a1.pdf]

# Electronic Supplementary Information to: Endohedral metallofullerenes, $M@C_{60}$ ( $M=Ca, Na, Sr$ ): Selective adsorption and sensing of open-shell $NO_x$ gases

Sherif Abdulkader Tawfik,<sup>\*a</sup> X. Y. Cui,<sup>b</sup> S. P. Ringer,<sup>b</sup> and C. Stampfl<sup>a</sup>

Received Xth XXXXXXXXXXXX 20XX, Accepted Xth XXXXXXXXXXXX 20XX

First published on the web Xth XXXXXXXXXXXX 200X

DOI: 10.1039/b000000x

**Table 1** Net Hirshfeld charge in units of electron charge,  $|e|$ .  $\rho_M$  represents the Hirshfeld charge of the metal dopant before gas adsorption.  $\Delta\rho_M$  represents the change in the Hirshfeld charge of the metal dopant after gas adsorption compared to the net Hirshfeld charge of the metal before the adsorption of the gas molecule.  $\rho_g$  represents the Hirshfeld charge of the gas molecule. (GGA results)

| System             | $\rho_M$ | $\Delta\rho_M$ |                 | $\rho_g$ |                 |
|--------------------|----------|----------------|-----------------|----------|-----------------|
|                    |          | NO             | NO <sub>2</sub> | NO       | NO <sub>2</sub> |
| C <sub>60</sub>    |          |                |                 | +0.021   | -0.011          |
| Ca@C <sub>60</sub> | +0.756   | -0.005         | -0.008          | +0.015   | -0.129          |
| Na@C <sub>60</sub> | +0.376   | -0.001         | -0.011          | +0.035   | -0.131          |
| Sr@C <sub>60</sub> | +0.69    | -0.011         | -0.013          | +0.002   | -0.129          |

## 1 Cartesian Coordinates

The Cartesian coordinate files for the 32 GGA structures and the 32 VV structures are attached in a separate zipped folder.

## 2 Spin Density Distribution

<sup>a</sup> School of Physics, The University of Sydney, Sydney, New South Wales, 2006, Australia. E-mail: [sherif.abbas@sydney.edu.au](mailto:sherif.abbas@sydney.edu.au)

<sup>b</sup> Australian Institute for Nanoscale Science and Technology, and School of Aerospace, Mechanical and Mechatronic Engineering, The University of Sydney, New South Wales, 2006, Australia.

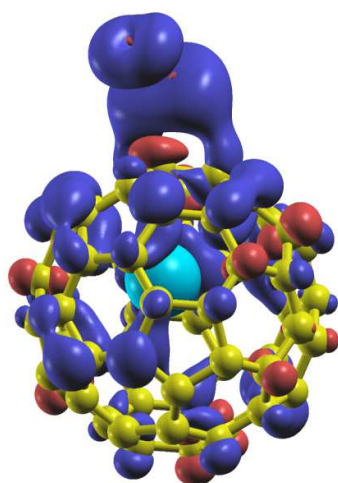

**Fig. 1** (Color online) The spin-density distributions for the Ca@C<sub>60</sub>+NO. The isovalue is  $\pm 0.0005e/\text{\AA}^3$ .

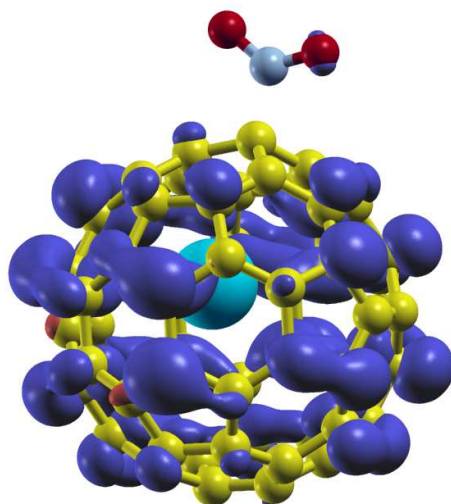

**Fig. 2** (Color online) The spin-density distributions for the Ca@C<sub>60</sub>+NO<sub>2</sub>. The isovalue is  $\pm 0.0005e/\text{\AA}^3$ .

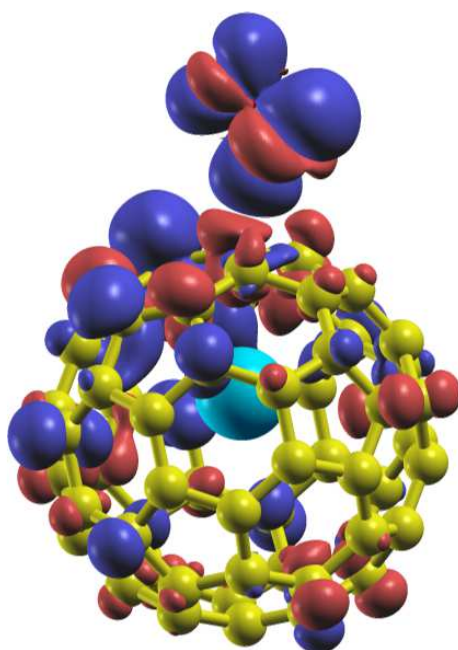

**Fig. 3** (Color online) The spin-density distributions for the Na@C<sub>60</sub>+NO. The isovalue is  $\pm 0.0005 e/\text{\AA}^3$ .

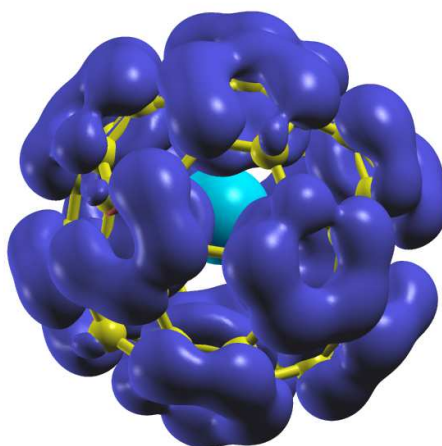

**Fig. 4** (Color online) The spin-density distributions for the Sr@C<sub>60</sub>. The isovalue is  $\pm 0.0005 e/\text{\AA}^3$ .

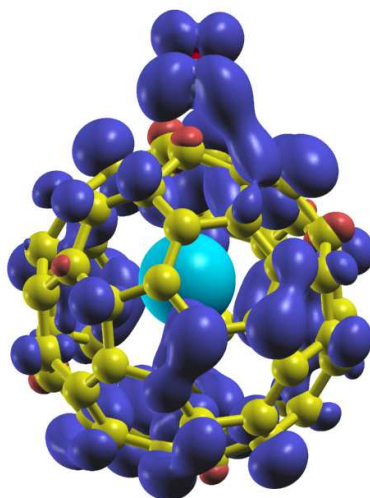

**Fig. 5** (Color online) The spin-density distributions for the Sr@C<sub>60</sub>+NO. The isovalue is  $\pm 0.0005e/\text{\AA}^3$ .

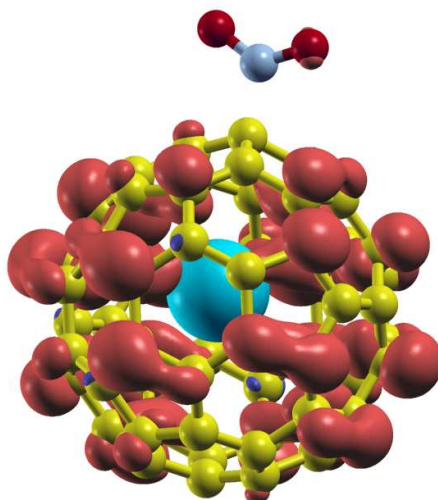

**Fig. 6** (Color online) The spin-density distributions for the Sr@C<sub>60</sub>+NO<sub>2</sub>. The isovalue is  $\pm 0.0005e/\text{\AA}^3$ .

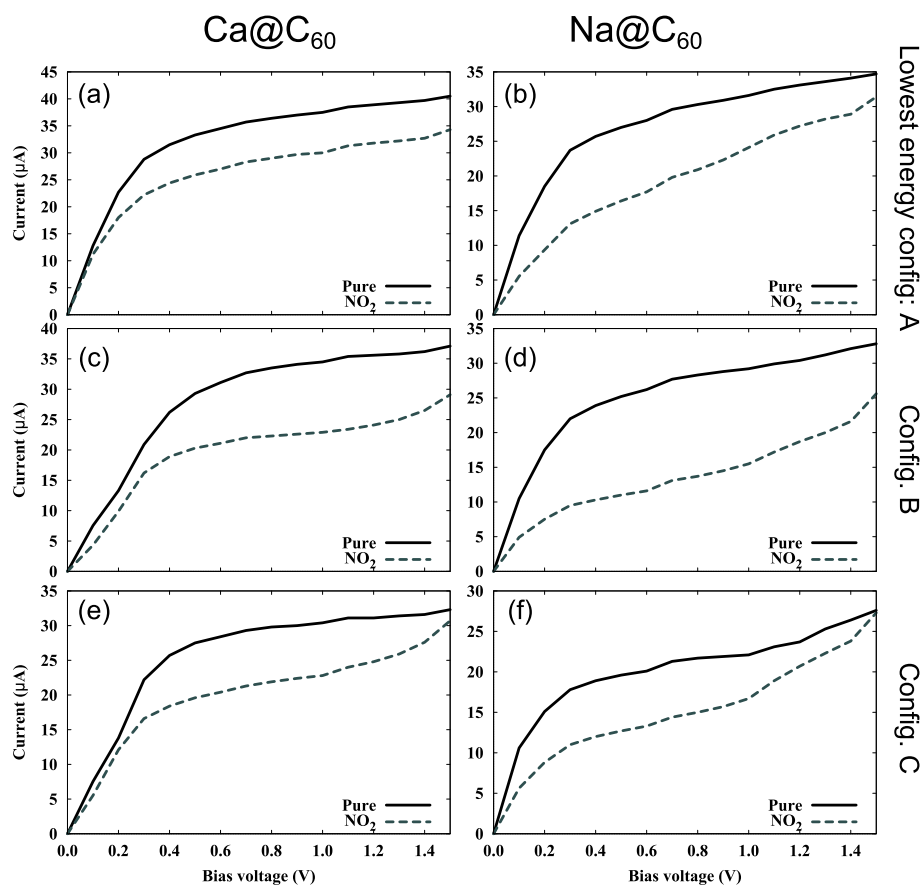

**Fig. 7** (Color online) The current-voltage characteristics (IVC) for the Na@C<sub>60</sub> and Ca@C<sub>60</sub> systems for pure (without NO<sub>2</sub> adsorption) and with NO<sub>2</sub> adsorption. The lowest energy configurations (as shown in Fig. 4 in the manuscript) are repeated here in parts (a) and (b). The IVC for the two alternative configurations B and C (described in the main text) are shown in parts (c-f).
